# Supplementary material
Source: Springer Nature journal article supplement (https://www.springermedizin.de/resource/supplementary/12880_2014_228_MOESM7_ESM.pdf/9450278)

**a**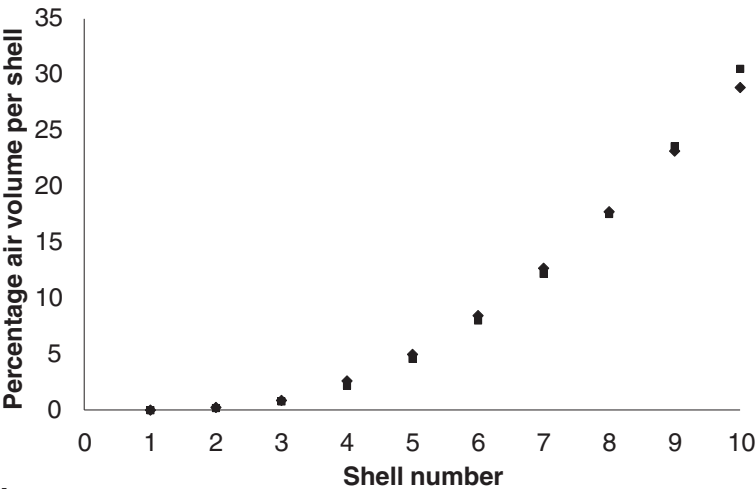**b**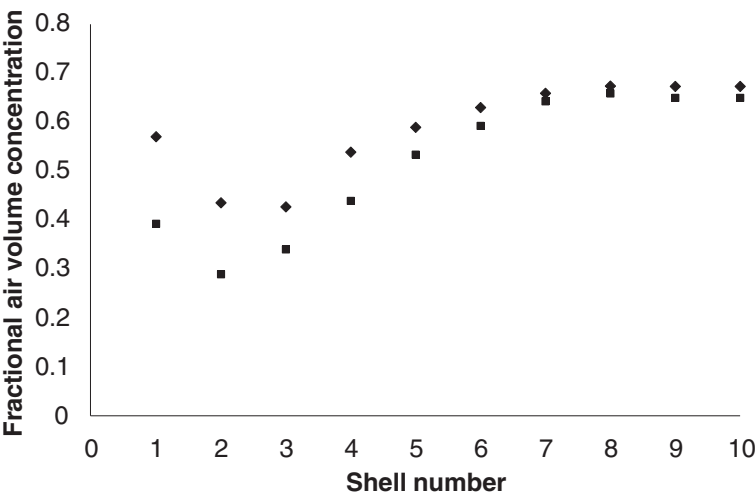

Supplement: MOESM7 [file 9450278]
